# Supplementary material for: A peptide from human semenogelin I self-assembles into a pH-responsive hydrogel
Source: Royal Society of Chemistry journal article supplement (doi:10.1039/c4sm01793e), 2014-11-05
Supplement: c4sm01793e1.pdf [file c4sm01793e1.pdf]

## **A Peptide from Human Semenogelin Self-Assembles into a pH Responsive Hydrogel**

Birgitta Frohm, Jamie E. DeNizio, David S. M. Lee, Luigi Gentile, Ulf Olsson, Johan Malm, Karin S. Åkerfeldt, and Sara Linse

### **Supplementary Information**

#### **Semenogelin I**

Semenogelin I, SgI, is the predominant structural protein in the loose gel formed in freshly ejaculated human semen. The protein displays high  $Zn^{2+}$ -binding capacity and a  $Zn^{2+}$ -dependent structure.<sup>1</sup> The protein binds to spermatozoa<sup>2</sup> and appears to play a role in optimizing conception.<sup>3</sup> The 439 amino acid sequence is similar to intrinsically unfolded proteins,<sup>4</sup> and contains six repeats with pair-wise high sequence similarity (Figure SI-1). The peptide studied here corresponds to residues 38-48 in SgI. The prostate-specific antigen (PSA), the major protease in seminal plasma, cleaves SgI at several specific sites (Figure SI-1, SI-2).<sup>5</sup> One cleavage site, at residue 44, is located in the center of the gel forming peptide, indicating that the 38-48 region is important for gel formation and liquefaction in the natural processing of the protein.

## Semenogelin I repeats

### Similarity class I

261 NKISYQSSST EERRLHYGEN GVQKDVSQSS IYSQTEEKAQ GKSQKQITIP SQEQEHSQKA  
321 NKISYQSSST EERRLHYGEN GVQKDVSQRS IYSQTEKLVA GKSQKQIQAP NPKQEPWHGE

### Similarity class II

141 ERLWVHGLSK EQTSVSGAQK GRKQGGSS YVLQTEELVA NKQORETKNS HQNKGHYQNV  
201 VEVREEHSSK VQTSLCPAHQ DKLQHGSKDI FSTQDELLVY NKNQHQTKNL NQDQQHGRKA

### Similarity class III

381 KGESGQSTNR EQDLLSHEQK GRHQHGSHGG LDIVIEQED DSDRHLAQHL NNDRNPLFT  
70 TTKSQRHLGG SQQLLHNKQE GRDHDKSKGH FHRVVIHHKG GKAHRGTQNP SQDQGNPSG

**Figure SI-1.** Sequence repeats of human semenogelin I, with the PSA cleavage sites indicated by arrows.

## PSA cleavage map

QKGGSKGRLPSEFSQFPHGQKQGHYSGQKQTESK**GSFSIQYTYHV**DANDHDQSRKSQQYDLNALHKT-70  
TKSQRHLGGSSQQLLHNKQEGRDHDKSKGHFHRVVIHHKGGKAHRGTQNPSSQDQGNPSGKGISSQYSNTE-140  
ERLWVHGLSKEQTSVSGAQKGRKQGGSSYVLQTEELVANKQORETKNSHQNKGHYQNVVEVREEHSSK-210  
VQTSLCPAHQDKLQHGSKDIFSTQDELLVYNKNQHQTKNLNQDQQHGRKANKISYQSSSTEERRLHYGEN-280  
GVQKDVSQSSIYSQTEEKAQGKSQKQITIPSQEQEHSQKANKISYQSSSTEERRLHYGENGVQKDVSQRS-350  
IYSQTEKLVAGKSQIQAPNPKQEPWHGENAKGESGQSTNREQDLLSHEQKGRHQHGSHGGLDIVIEQED-420  
DSDRHLAQHLNNDRNPLFT-439

**Figure SI-2.** Amino acid sequence of human semenogelin I with PSA cleavage sites as arrows. The hydrogel peptide sequence (residues 38-48) is highlighted in red.

## Peptide purification

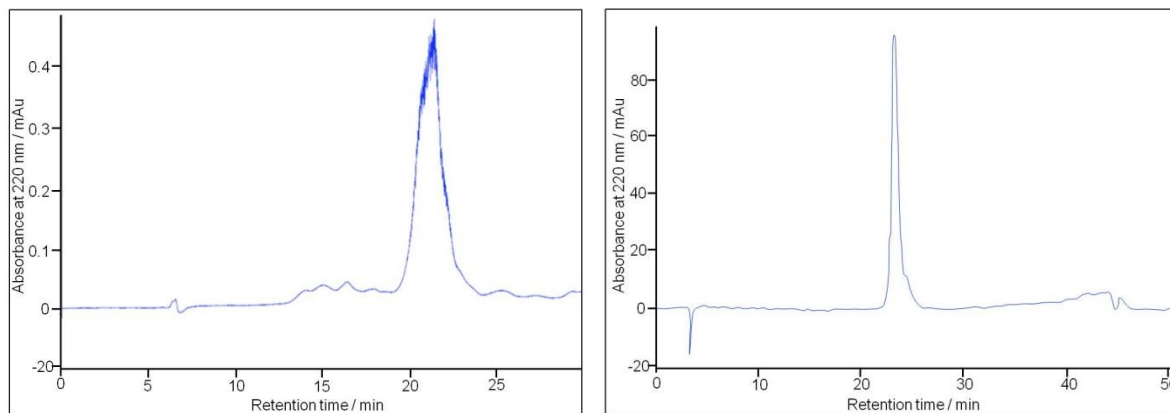

**Figure SI-3. Left:** Purification of crude SgI:38-48 peptide by reversed phase HPLC using a preparative column (Vydac C4, 10-15  $\mu\text{m}$ , 22 x 250 mm). **Right:** Analytical HPLC of purified SgI:38-48 peptide using an analytical column (Vydac C4, 5  $\mu\text{m}$ , 4.6 x 250 mm).

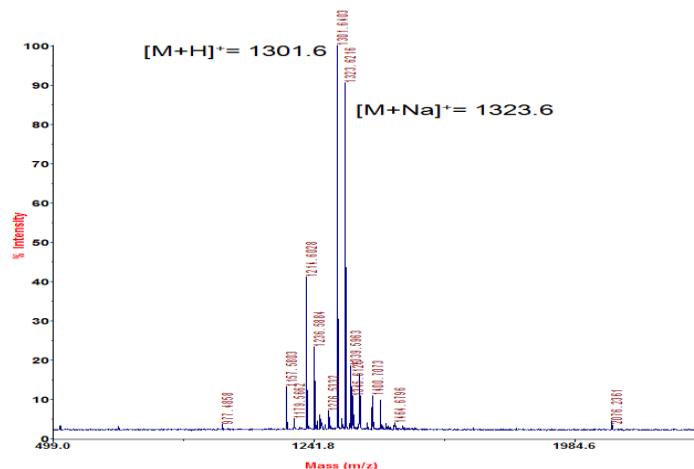

**Figure SI-4:** Maldi-TOF mass spectrometry of purified SgI:38-48 peptide.

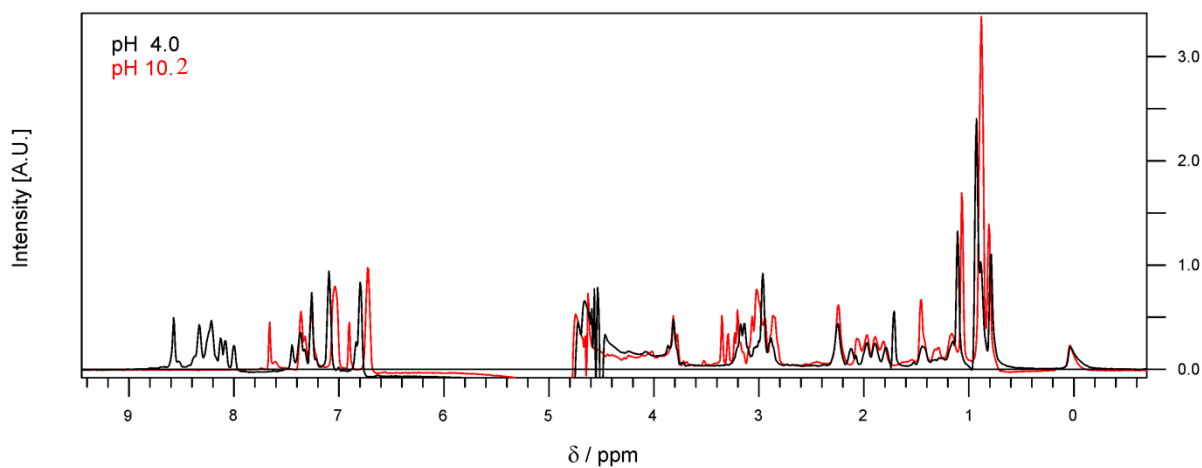

**Figure SI-5:** Overlay of  $^1\text{H}$  NMR spectra of purified SgI:38-48 peptide at pH 4.0 (red) and 10.2 (black) in  $\text{H}_2\text{O}$  with 10%  $\text{D}_2\text{O}$ .

## Parallel versus anti-parallel arrangement

To evaluate the likelihood for anti-parallel versus parallel  $\beta$ -sheet arrangement of Sg38-48, a potential energy was calculated for each orientation using the empirical parameters by Keskin *et al.*<sup>6</sup> for solvent-mediated and residue-residue contact potential (Figure SI-5). The calculations were made in register and for each possible out-of-register arrangement. This analysis suggests that the in-register arrangements are most stable, with a slight preference for anti-parallel over parallel arrangement. This analysis does not take into account the electrostatic repulsion between end charges, which would further disfavor the parallel orientation. In summary, the in-register anti-parallel arrangement is most likely. The second best arrangement seems to be a two-residue-out-of register mode +2 or -2 (=+9).

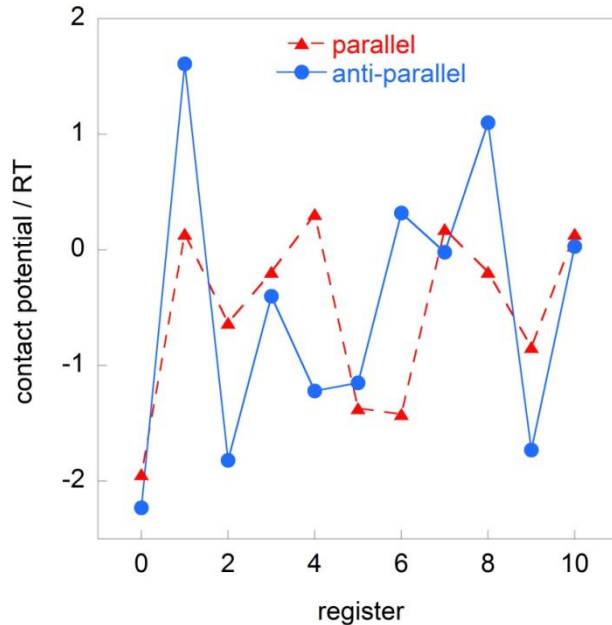

**Figure SI-6.** Contact potential summed over all pair-wise interactions in each possible in-register and out-of-register parallel (red triangles) and anti-parallel (round blue dots) arrangements, based on Table 1 in Keskin et al 1998.

## References

1. M Jonsson, S. Linse, B. Frohm, Å. Lundwall, J. Malm. *Biochem. J.* 2005, **387**, 477-453
2. M. Jonsson, B. Frohm, J. Malm, J. Androl. 2010, **31**, 560-565.
3. K.P. Tremellen, D. Valbuera, J. Landeras, A. Ballesteros, J. Martinez, S. Mendoza, R.J. Norman, S. A. Robertson, C. Simón. *Hum. Reprod.* 2000, **15**, 2653-2658.
4. V.N. Uversky. *J Biomed. Biotechnol.* 2010, 2010, 568068.
5. J. Malm, J. Hellman, P. Hogg, H. Lilja. *Prostate* 2000, **45**, 132-139.
6. O. Keskin, I. Bahar, A.Y. Badretdinov, O.B. Ptitsyn, R.L. Jernigan. *Protein Science* 1998 **7**, 2578-2586
